# Supplementary material
Source: MDPI journal article supplement (https://www.mdpi.com/2072-666X/6/11/1446)
Supplement: s1 [file s1]

## Supplementary Materials

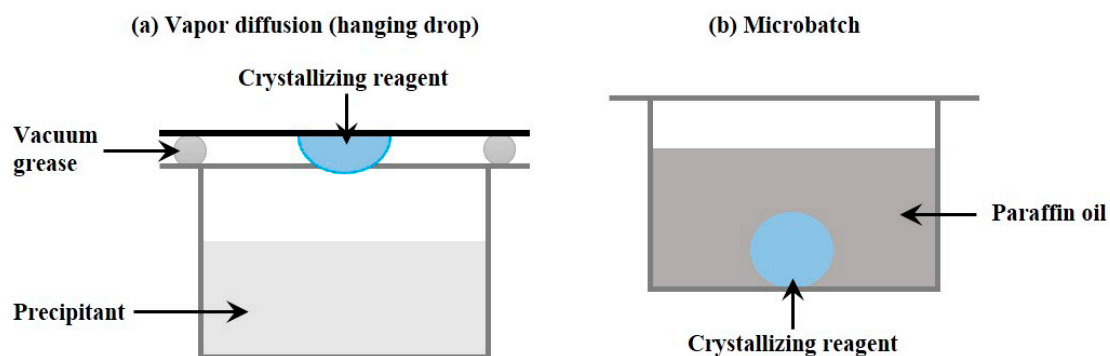

**Figure S1.** Schematic illustration of the traditional setups of (a) the vapor diffusion (hanging drop) method and (b) the microbatch method.

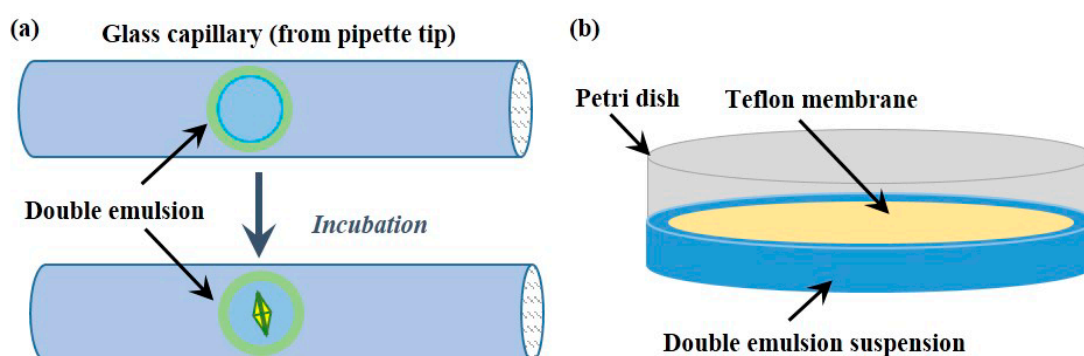

**Figure S2.** Schematic illustration of storing the double emulsions in (a) glass capillaries and under (b) a Teflon membrane.

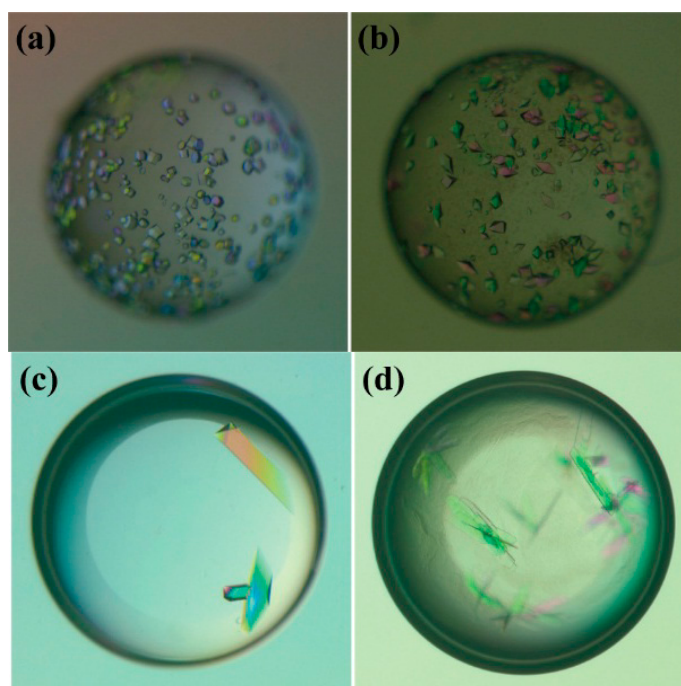

**Figure S3.** Crystallization results in droplets using the conventional microbatch method for (a) lysozyme, (b) thaumatin, (c) trypsin and (d) horseradish peroxidase. The total volume of one droplet is 1  $\mu\text{L}$  of protein, and precipitant solutions are mixed at an equal volume ratio.

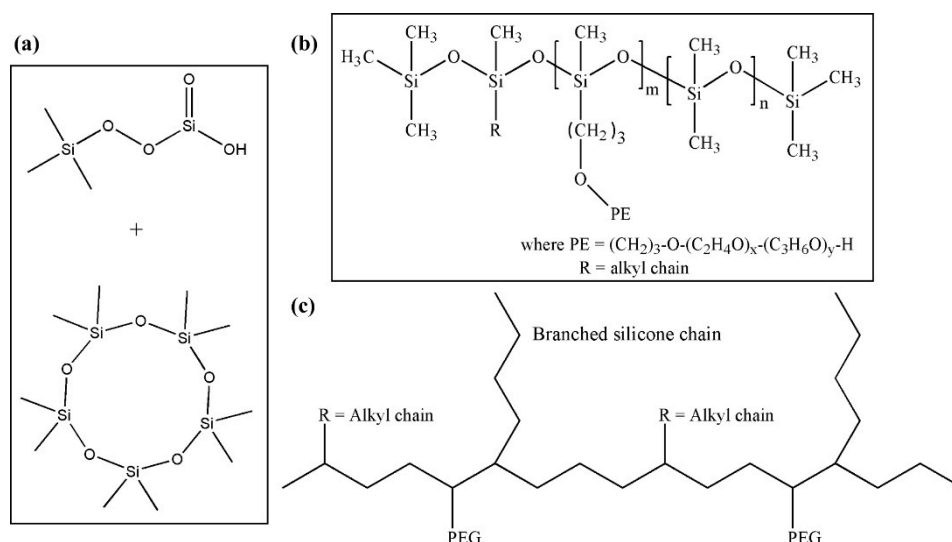

**Figure S4.** Molecular structures of: (a) 749 Fluid; (b) ABIL EM 90; and (c) KF-6038.

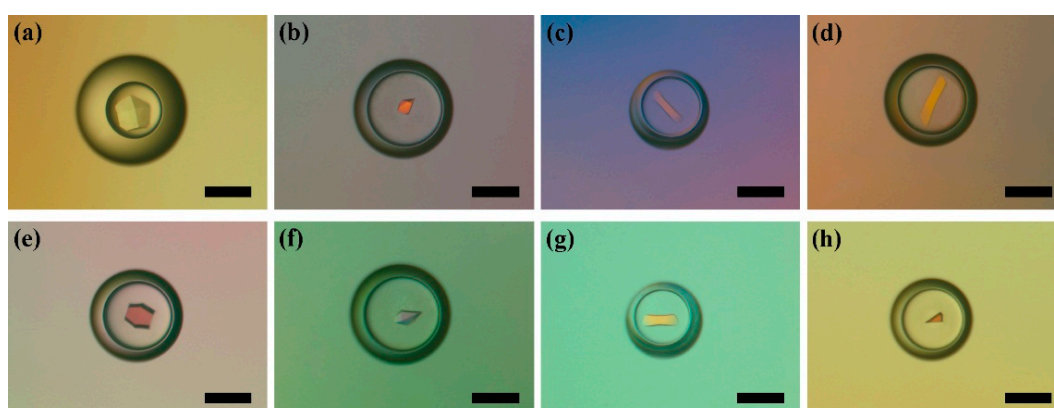

**Figure S5.** Crystallization results in double emulsion with KF-6038 as the surfactant using the vapor diffusion method (a–d) and the microbatch method (e–h) for (a,e) lysozyme, (b,f) thaumatin, (c,g) trypsin and (d,h) horseradish peroxidase. Scale bars: 300  $\mu\text{m}$ .

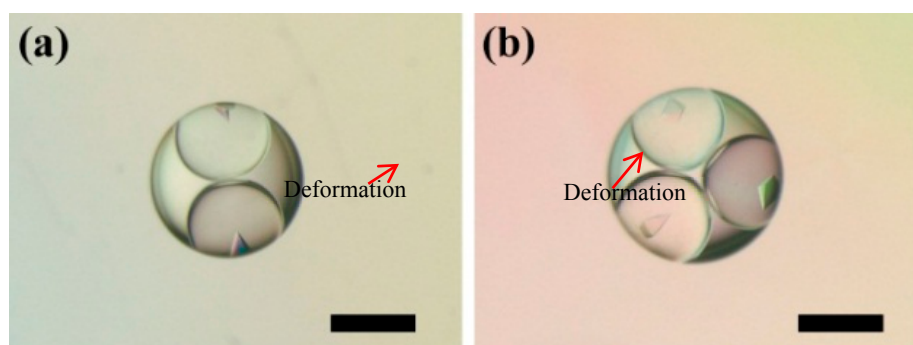

**Figure S6.** The effect of the non-homogeneous interface on protein crystallization in multiple emulsions containing (a) two and (b) three inner aqueous droplets, showing the crystals tend to occur in the deformed areas. The model protein: 20 mg/mL thaumatin. Scale bars: 500  $\mu\text{m}$ .
